# Supplementary material for: Unprotected amine transfer performed by non-heme iron(ii) complexes
Source: Royal Society of Chemistry journal article supplement (doi:10.1039/d2cc04992a), 2022-11-28
Supplement: d2cc04992a1.pdf [file d2cc04992a1.pdf]

## Supplementary Informations for :

### Unprotected Amine Transfer Catalysed by Non-Heme Iron(II) Complex

Alizée Boullé,<sup>a</sup> Aminata Doumbia,<sup>a</sup> Jean-Pierre Mahy<sup>a\*</sup> and Frédéric Avenier<sup>a\*</sup>

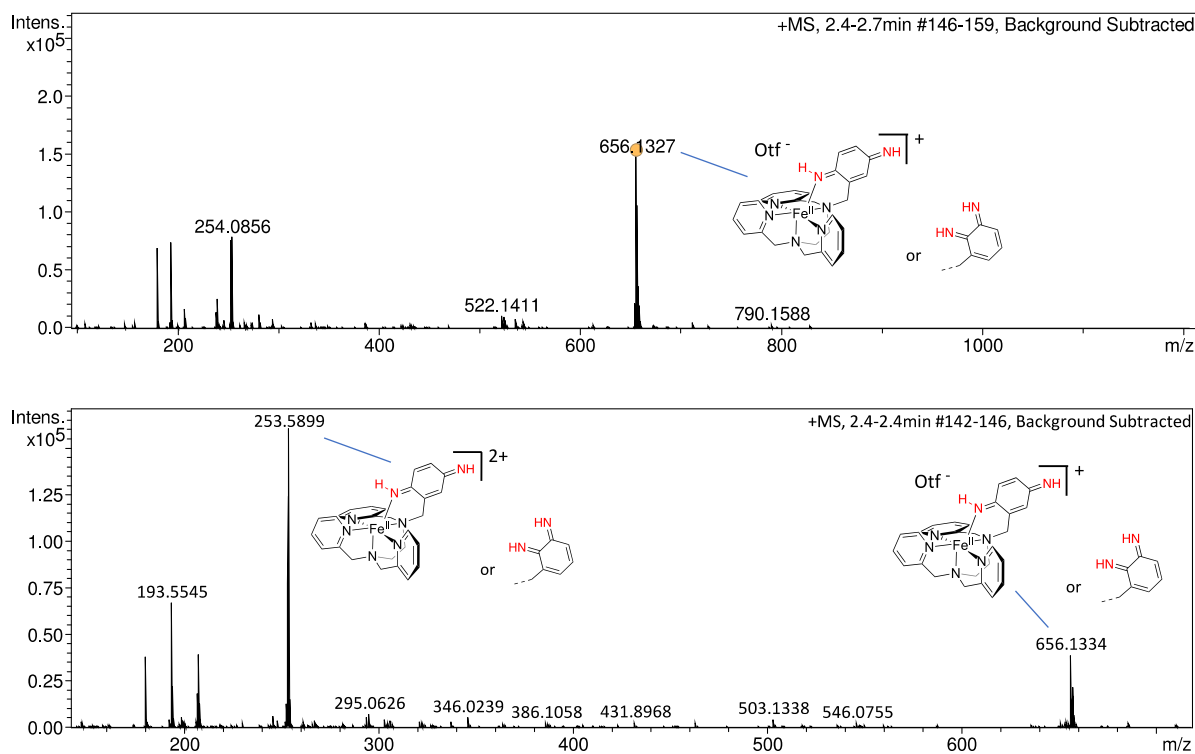

**Figure S1.** ESI-MS analysis of the solution after reaction of complex 1 with 5 equivalents of PivONH<sub>2</sub> for 16h in acetonitrile (top) or in trifluoroethanol (bottom).

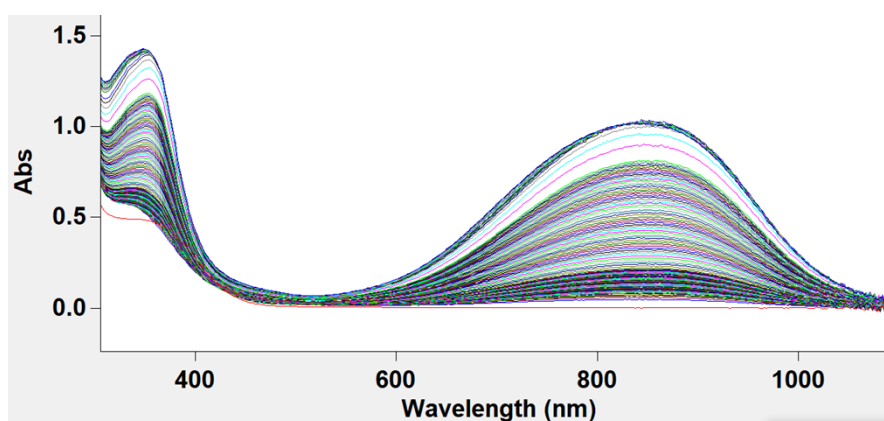

**Figure S2.** Time resolved UV-Vis. Spectrum for the reaction of complex 1 (0.1 mM) with 3 equivalents of PivONH<sub>2</sub> in trifluoroethanol (TFE) at room temperature for 3 hours.

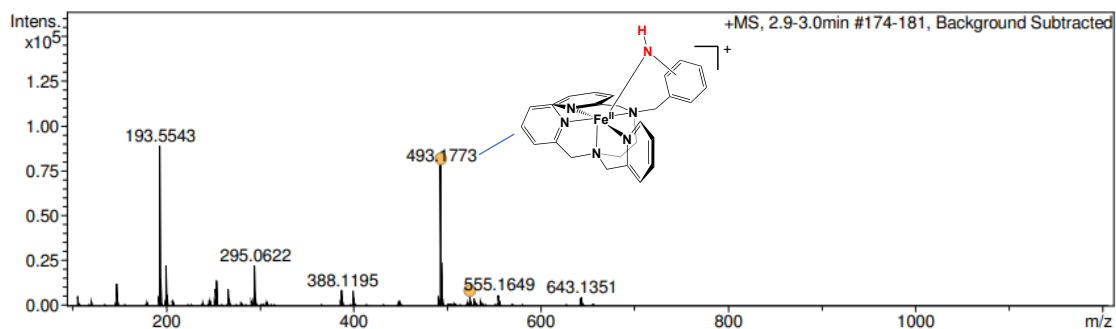

**Figure S3.** ESI-MS analysis of the solution after reaction of complex 1 with 3 equivalents of PivONH<sub>2</sub> in acetonitrile for 16h.

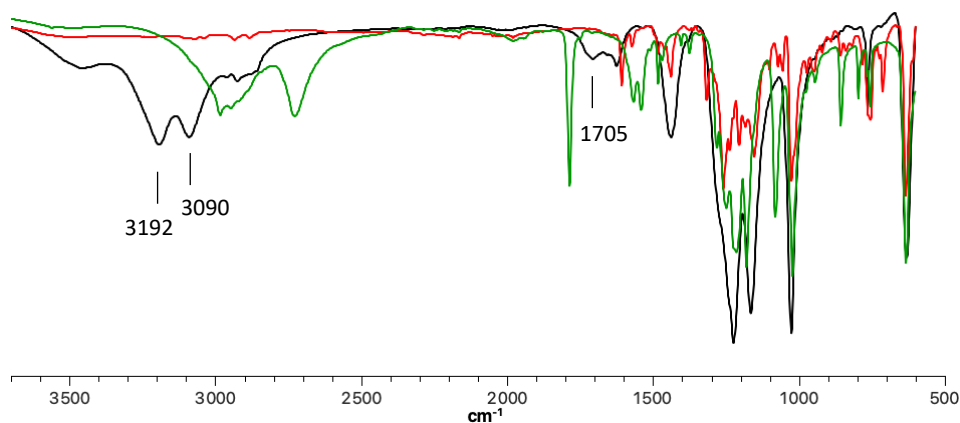

**Figure S4.** FT-IR spectra of complex 1 (red line), PivONH<sub>2</sub> (green line) and the final complex obtained after reaction of complex 1 with PivONH<sub>2</sub> (5 equiv.) in acetonitrile and precipitated by addition of diethyl ether.

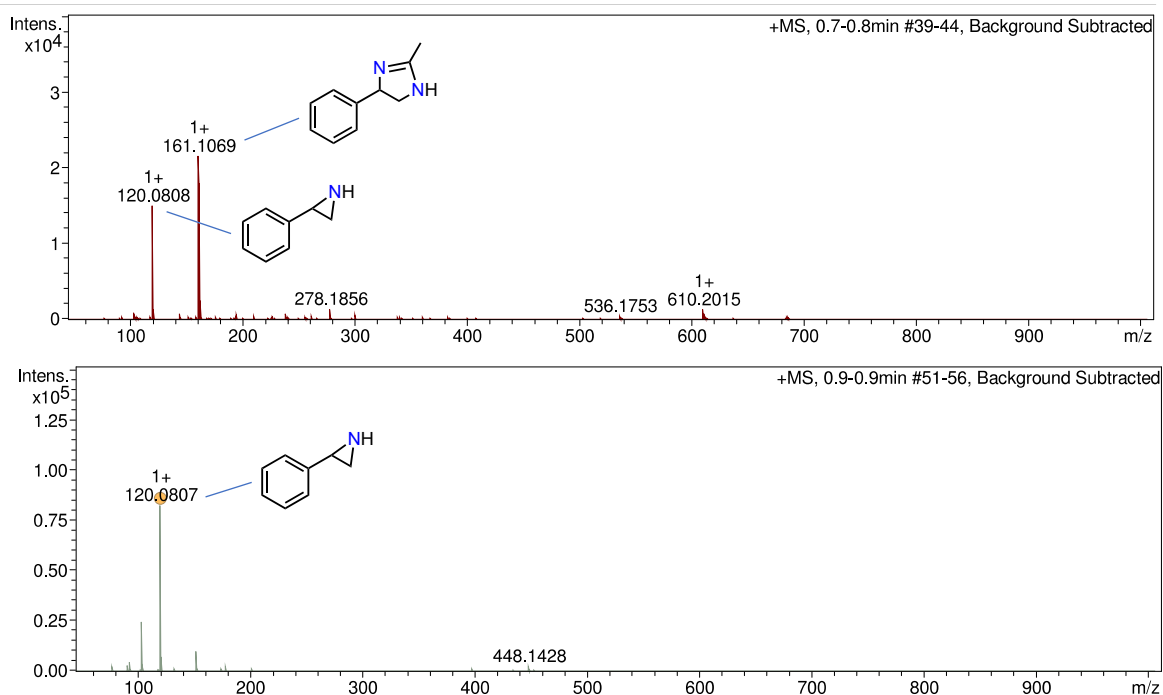

**Figure S5.** ESI-MS analysis of the organic layer after catalytic aziridination of styrene (10 mM) by complex 2 (1 mM) and OPivONH<sub>2</sub> (10 mM) and filtration on silica to remove the complex in acetonitrile (top) or in a dichloromethane/ MeOH solution (bottom).
